# Supplementary material for: Curcumin-loaded metal oxide aerogels: supercritical drying and stability
Source: Royal Society of Chemistry journal article supplement (doi:10.1039/d1ra06693e), 2021-01-01
Supplement: d1ra06693e1.pdf [file d1ra06693e1.pdf]

# Supporting Information

## **Curcumin-loaded metal oxide aerogels: supercritical drying and stability**

Wael Hamd<sup>†</sup>, Digambara Patra, Houssam El-Rassy\*

*Department of Chemistry, American University of Beirut, P.O. Box 11-0236, Riad El-Solh 1107 2020,  
Beirut, Lebanon*

\*Corresponding author

E-mail: Houssam.Rassy@aub.edu.lb

Phone: +961-1-374374 ext. 4051

<sup>†</sup>Current address: Department of Chemical Engineering, Faculty of Engineering, University of Balamand, P.O.  
Box 33 Amioun, El Koura, Lebanon

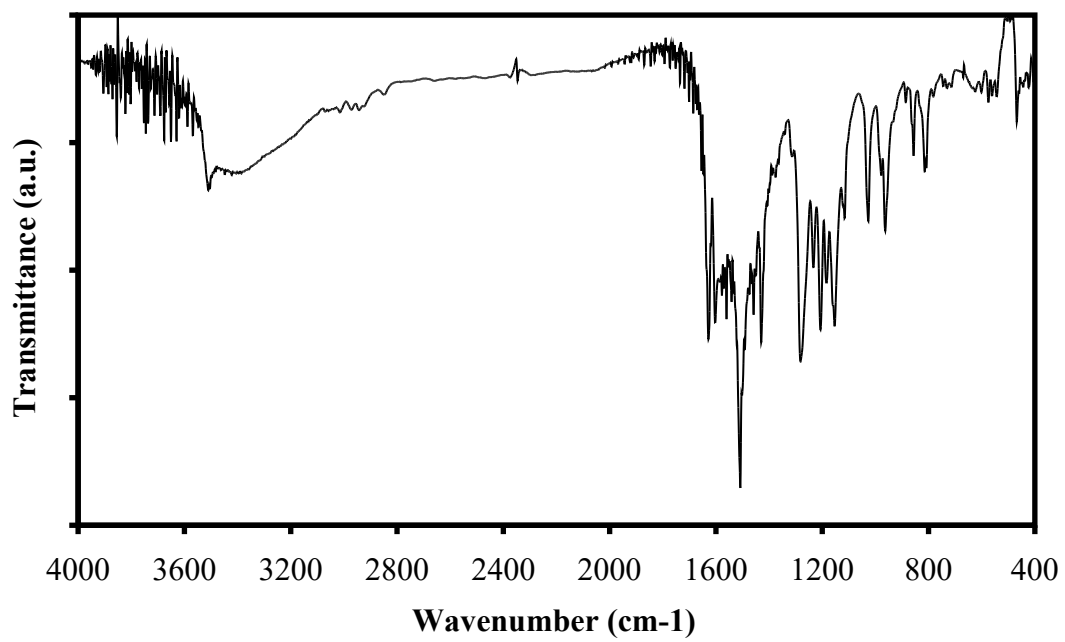

Figure S.1: FTIR spectrum of curcumin powder

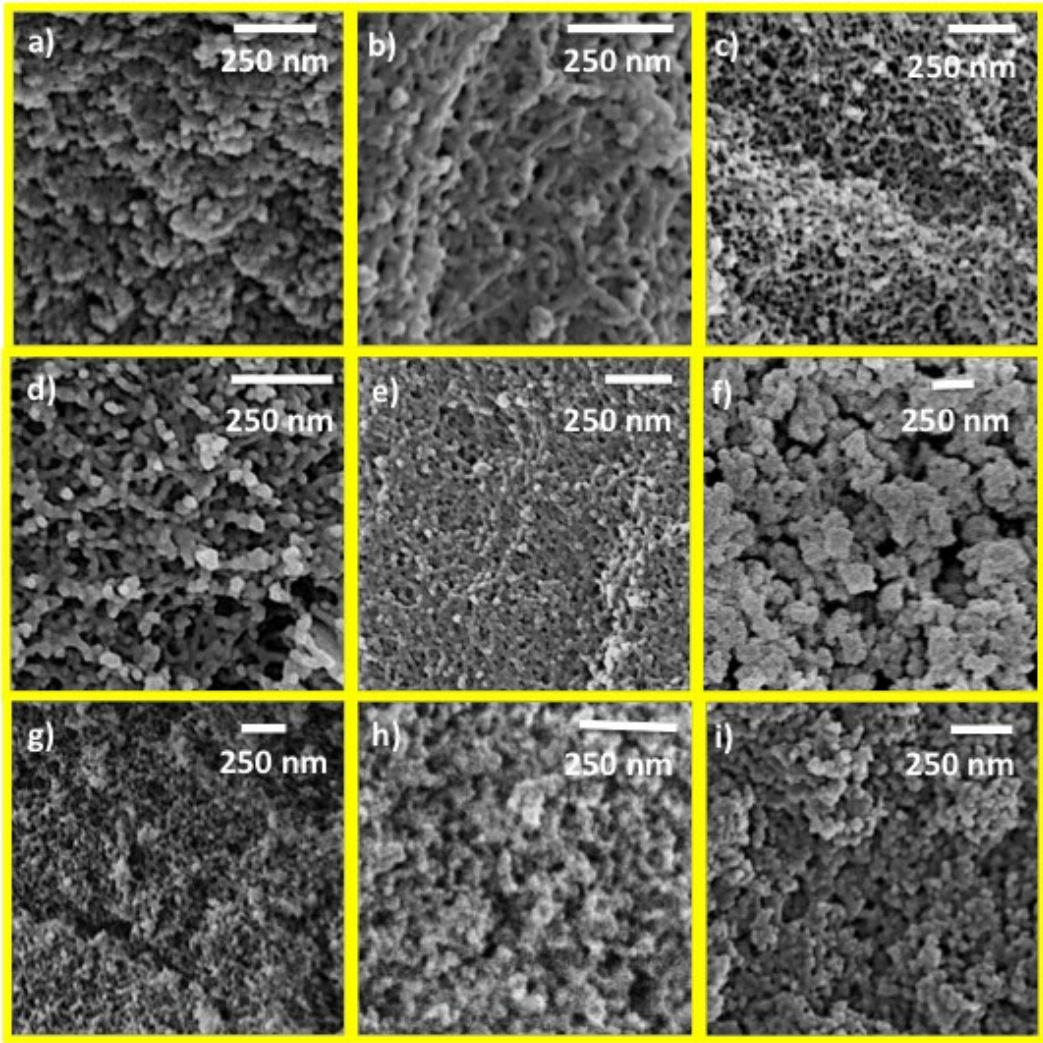

Figure S.2 : SEM images of hybrid inorganic-curcumin aerogels : (a) Si, (b) Dys, (c) Sm, (d) Nd, (e) Fe, (f) CoFe, (g) Ho, (h) Er, (i) Ti.

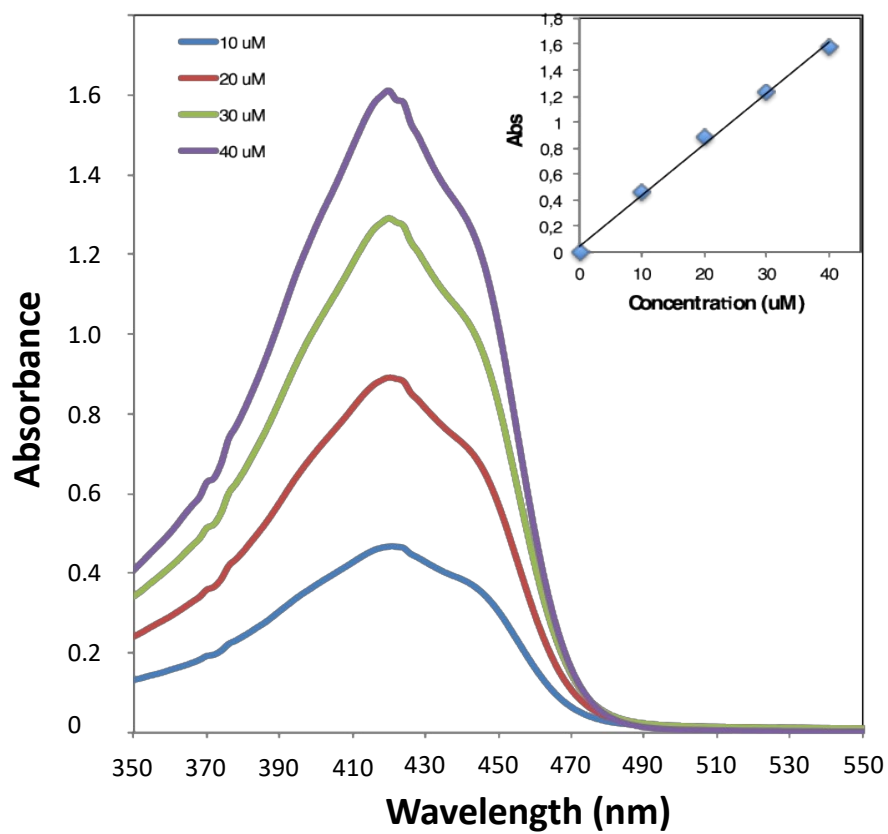

Figure S.3 : Variation of the UV-visible absorption spectra of curcumin in acetone as a function of the concentration.
